# Supplementary material
Source: Springer Nature journal article supplement (https://www.springermedizin.de/resource/supplementary/12985_2010_1019_MOESM3_ESM.pdf/9608966)

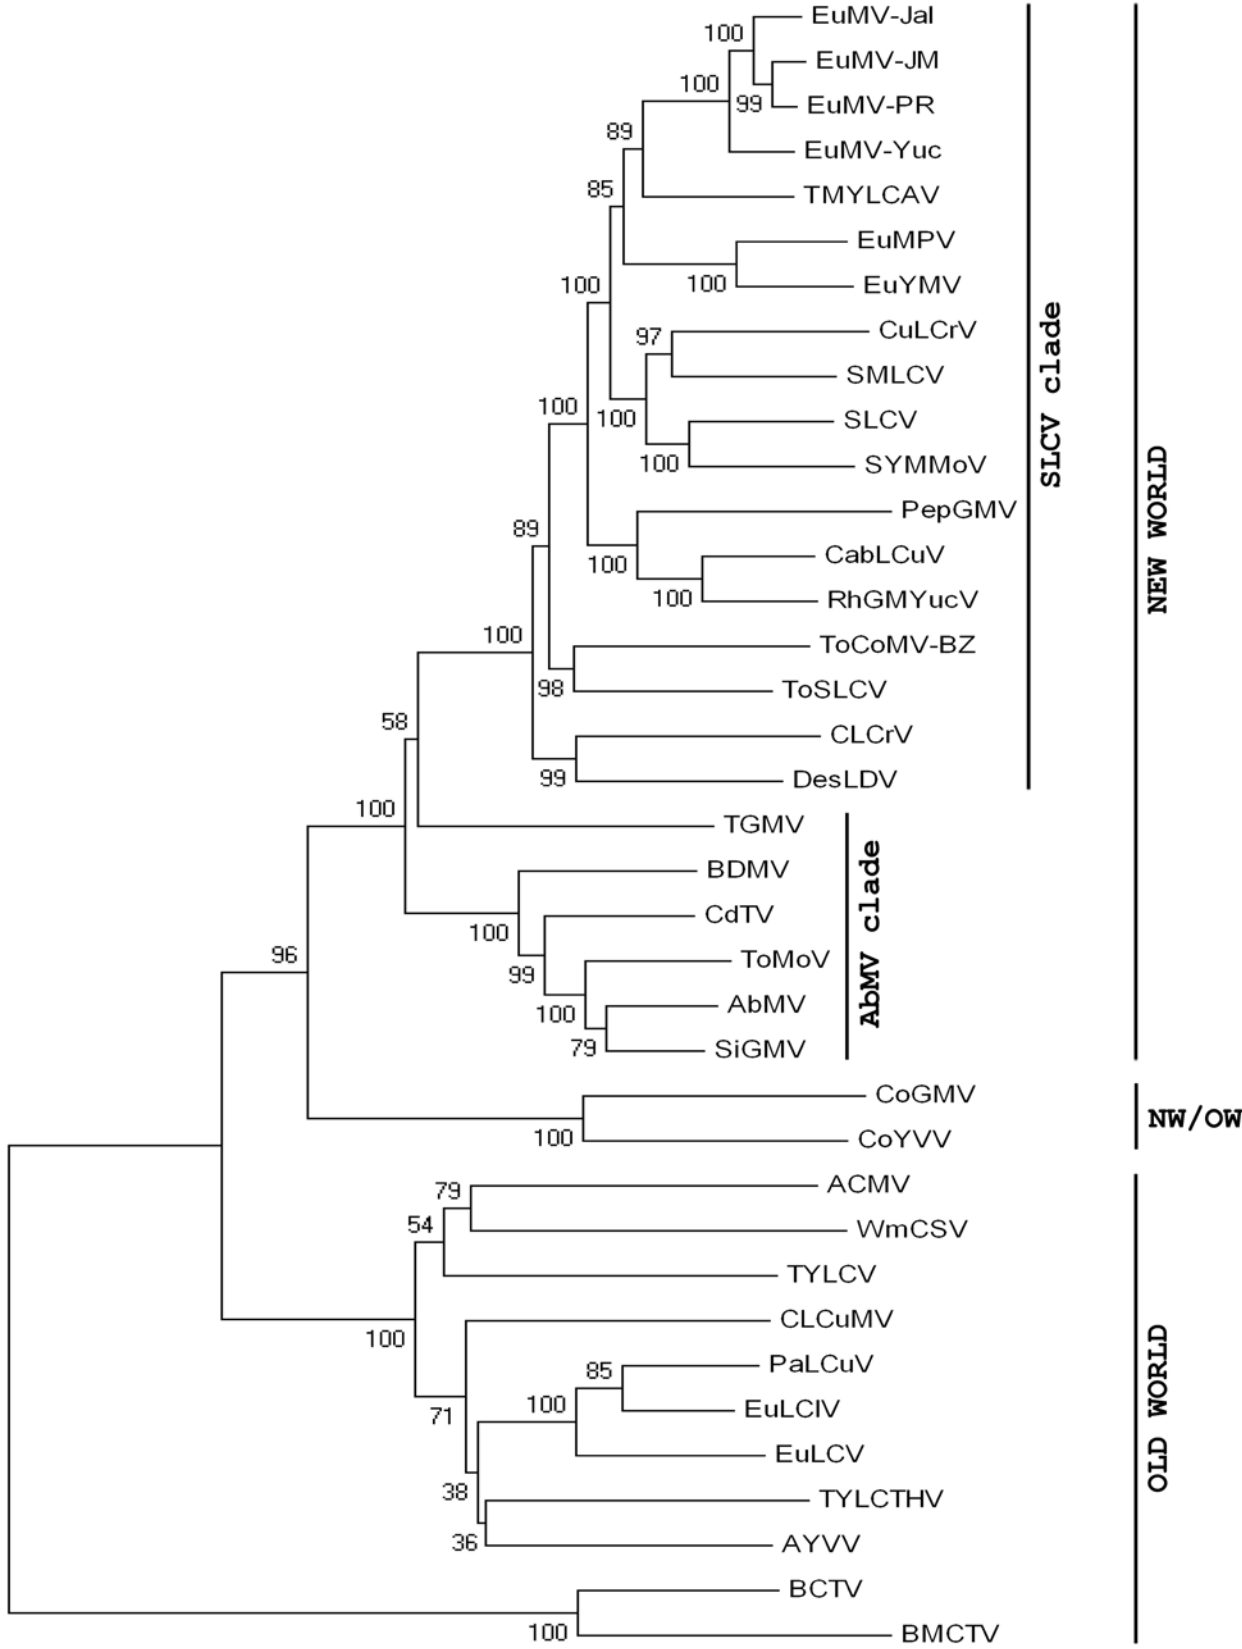

SICV clade

NEW WORLD

AbMV clade

NW/OW

OLD WORLD

0.05

Supplement: MOESM3 [file 9608966]
